# Supplementary material for: An amino-functionalized metal–organic framework achieving efficient capture–diffusion–conversion of CO2towards ultrafast Li–CO2batteries
Source: Royal Society of Chemistry journal article supplement (doi:10.1039/d2ta05342j), 2022-01-01
Supplement: d2ta05342j1.pdf [file d2ta05342j1.pdf]

# **Amino-Functionalized Metal-Organic Framework achieving Efficient Capture-Diffusion-Conversion of CO<sub>2</sub> towards Ultrafast Li-CO<sub>2</sub> Batteries**

Hu Hong,<sup>a, b, †</sup> Jiafeng He,<sup>b †</sup> Yanbo Wang,<sup>a</sup> Xun Guo,<sup>a</sup> Xiliang Zhao,<sup>b</sup> Xiaoke Wang,<sup>b</sup>

Chunyi Zhi<sup>a, b</sup> Hongfei Li,<sup>b, c\* †</sup> Cuiping Han,<sup>d, \*</sup>

<sup>a</sup> *Department of Materials Science and Engineering, City University of Hong Kong, 83 Tat Chee Avenue, Kowloon, Hong Kong, 999077, China*

<sup>b</sup> *Songshan Lake Materials Laboratory, Dongguan, Guangdong, 523808, China*

<sup>c</sup> *School of System Design and Intelligent Manufacturing, Southern University of Science and Technology, Shenzhen, 518055, China*

<sup>d</sup> *Faculty of Materials Science and Energy Engineering / Low Dimensional Energy Materials Research Center, Shenzhen Institutes of Advanced Technology, Chinese Academy of Sciences, Shenzhen, 518055, China*

Email: lihf@sslslab.org.cn; cp.han@siat.ac.cn

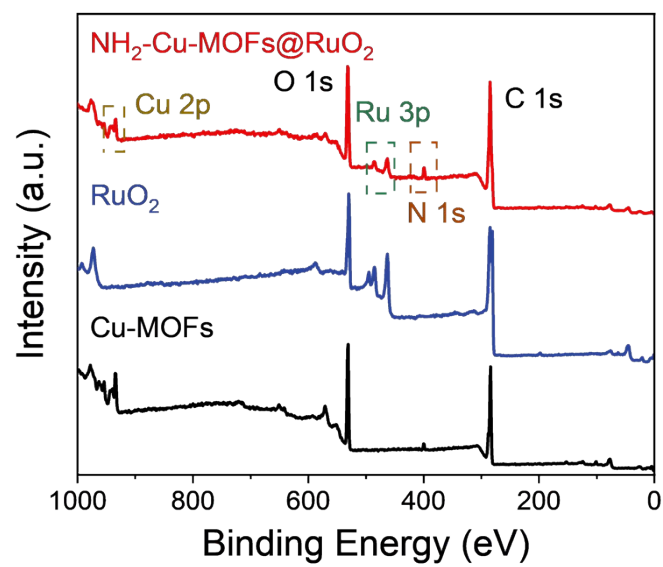

**Figure S1.** XPS survey spectra of  $\text{NH}_2\text{-Cu-MOFs@RuO}_2$ ,  $\text{RuO}_2$ , and Cu-MOFs.

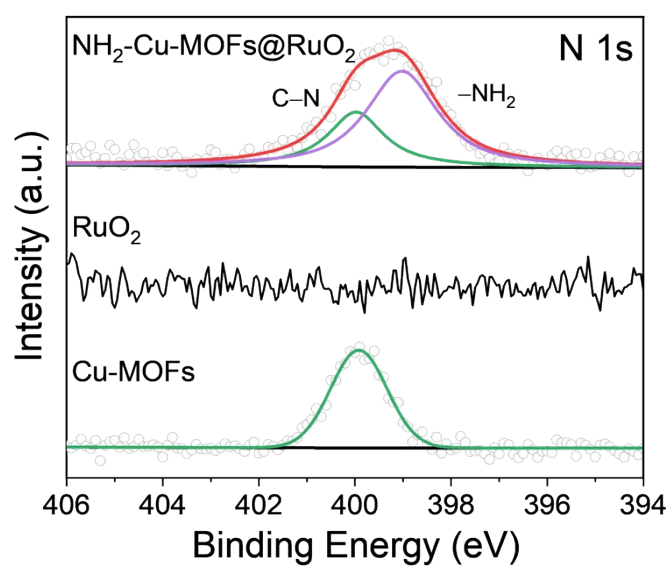

**Figure S2.** The high-resolution spectra of N 1s of NH<sub>2</sub>-Cu-MOFs@RuO<sub>2</sub>, RuO<sub>2</sub>, and Cu-MOFs.

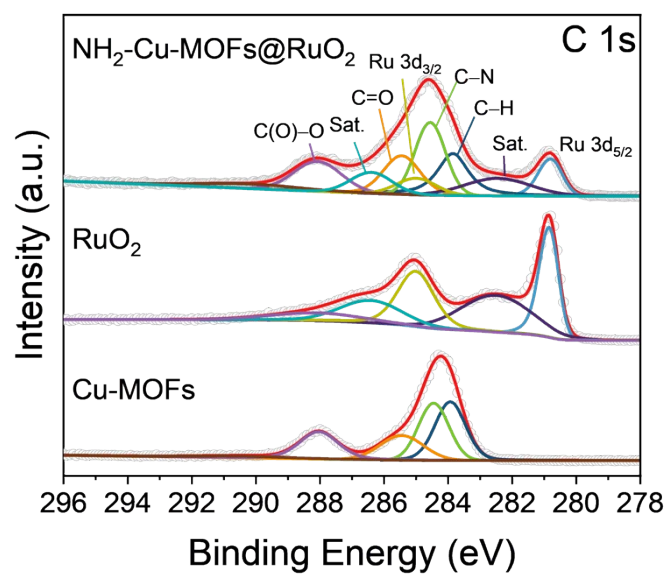

**Figure S3.** The high-resolution spectra of C 1s of NH<sub>2</sub>-Cu-MOFs@RuO<sub>2</sub>, RuO<sub>2</sub>, and Cu-MOFs.

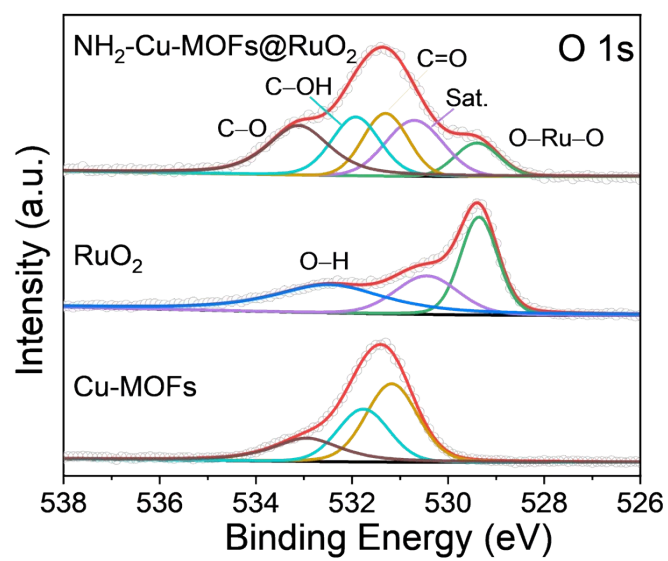

**Figure S4.** The high-resolution spectra of O 1s of NH<sub>2</sub>-Cu-MOFs@RuO<sub>2</sub>, RuO<sub>2</sub>, and Cu-MOFs.

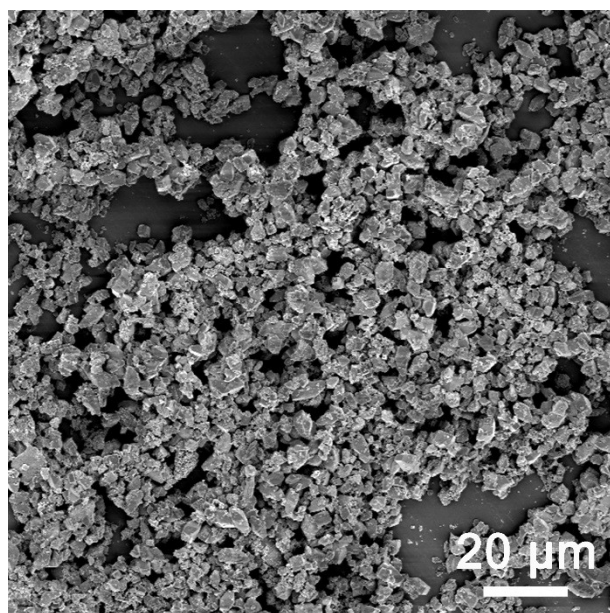

**Figure S5.** FESEM image of NH<sub>2</sub>-Cu-MOFs@RuO<sub>2</sub>.

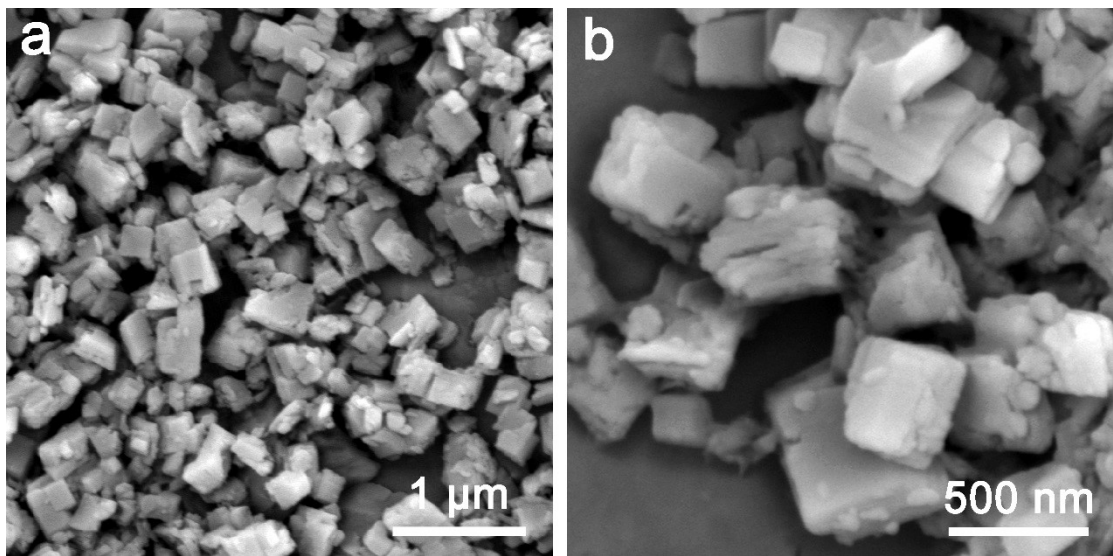

**Figure S6.** (a, b) FESEM images of Cu-MOFs at different magnifications.

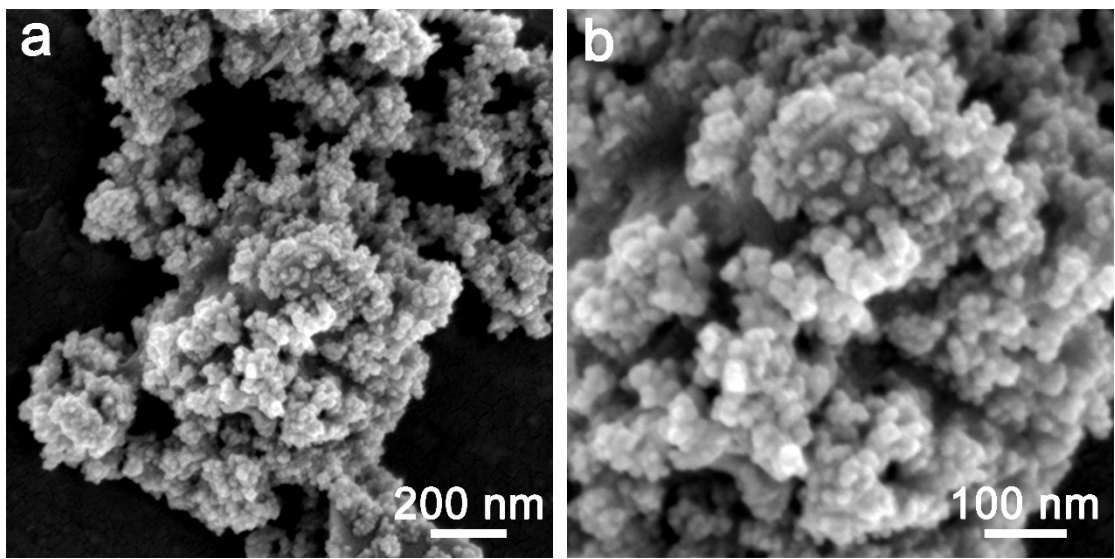

**Figure S7.** (a, b) FESEM image of RuO<sub>2</sub> at different magnifications.



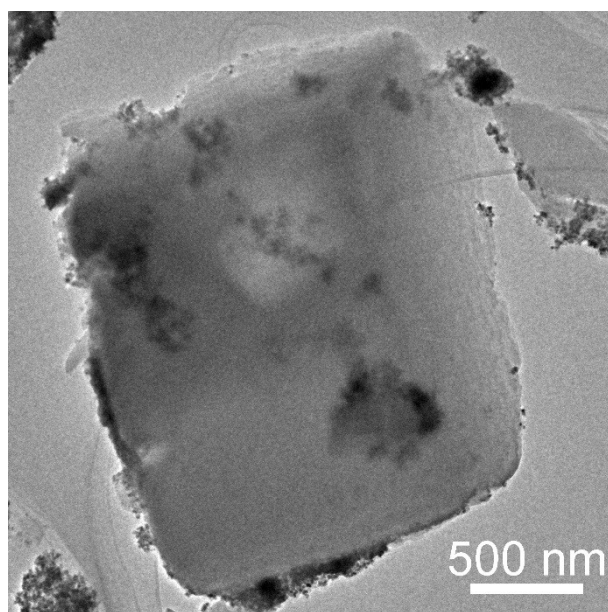

**Figure S8.** TEM image of the  $\text{NH}_2\text{-Cu-MOFs@RuO}_2$ .

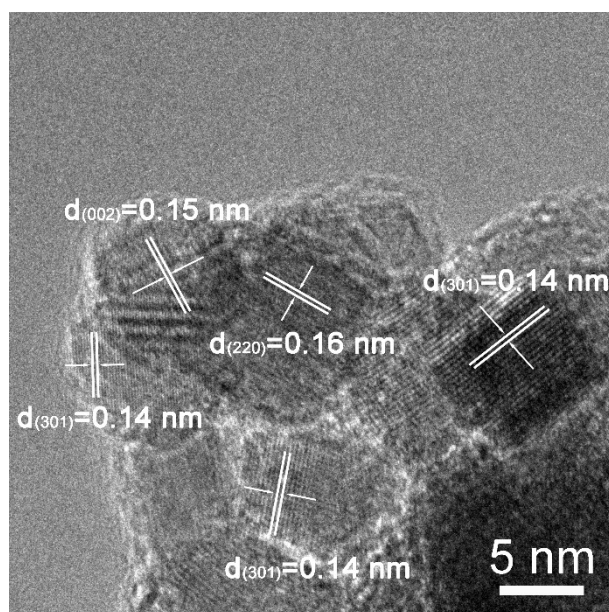

**Figure S9.** TEM image of RuO<sub>2</sub> inside NH<sub>2</sub>-Cu-MOFs@RuO<sub>2</sub>.

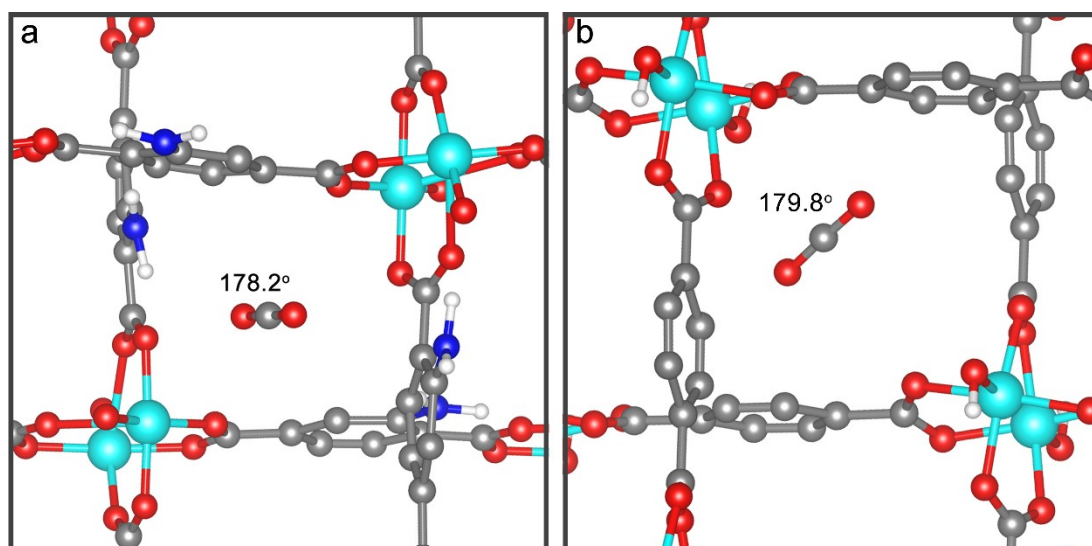

**Figure S10.** The simulation snapshots of (a)  $\text{NH}_2\text{-Cu-MOFs@RuO}_2$  and (b)  $\text{Cu-MOFs}$ .

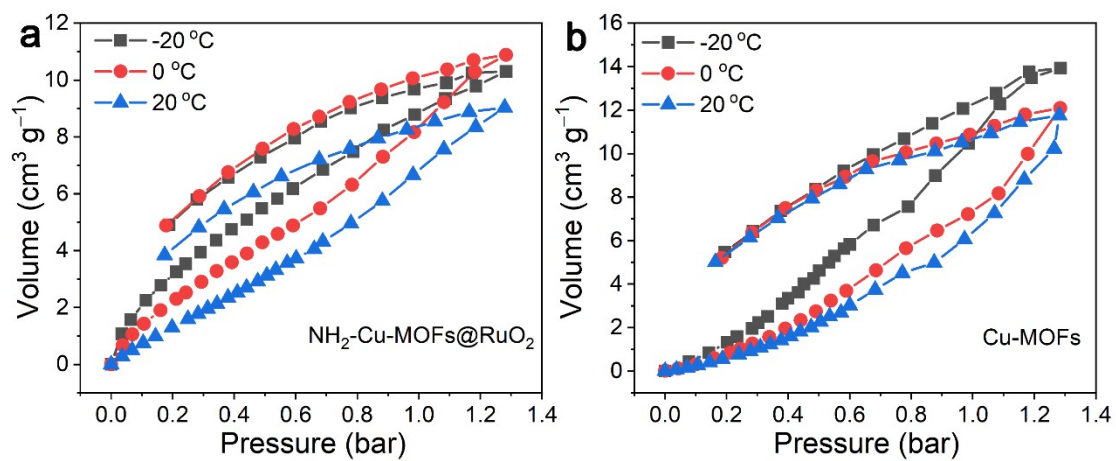

**Figure S11.** CO<sub>2</sub> sorption isotherms of (a) NH<sub>2</sub>-Cu-MOFs@RuO<sub>2</sub> and (b) Cu-MOFs at 253, 273, and 293 K.

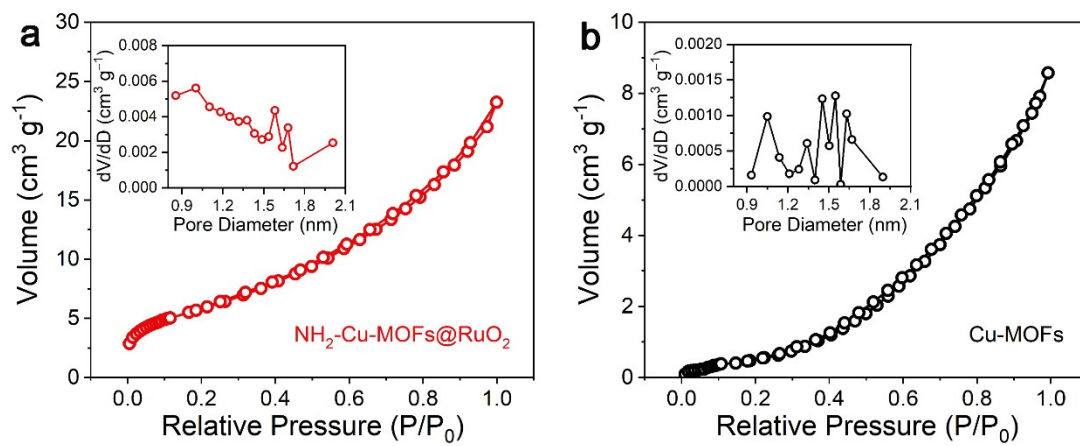

**Figure S12.**  $N_2$  adsorption-desorption isotherms of (a)  $NH_2-Cu-MOFs@RuO_2$  and (b) Cu-MOFs (inset shows corresponding micropore distributions, respectively).

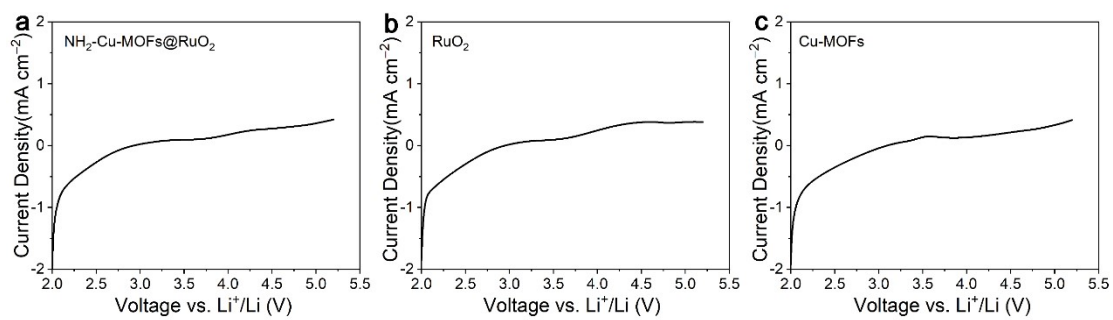

**Figure S13.** LSV curves of (a) NH<sub>2</sub>-Cu-MOFs@RuO<sub>2</sub>, (b) RuO<sub>2</sub>, and (c) Cu-MOFs.

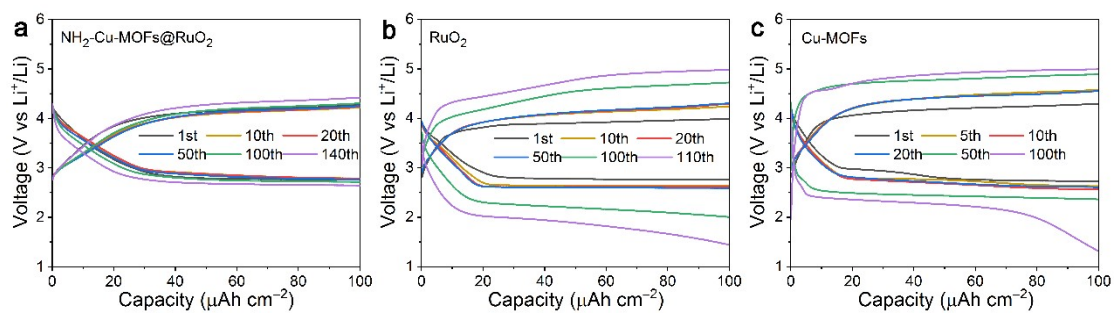

**Figure S14.** Charge-discharge curves of (a)  $\text{NH}_2\text{-Cu-MOFs@RuO}_2$ , (b)  $\text{RuO}_2$ , and (c) Cu-MOFs.

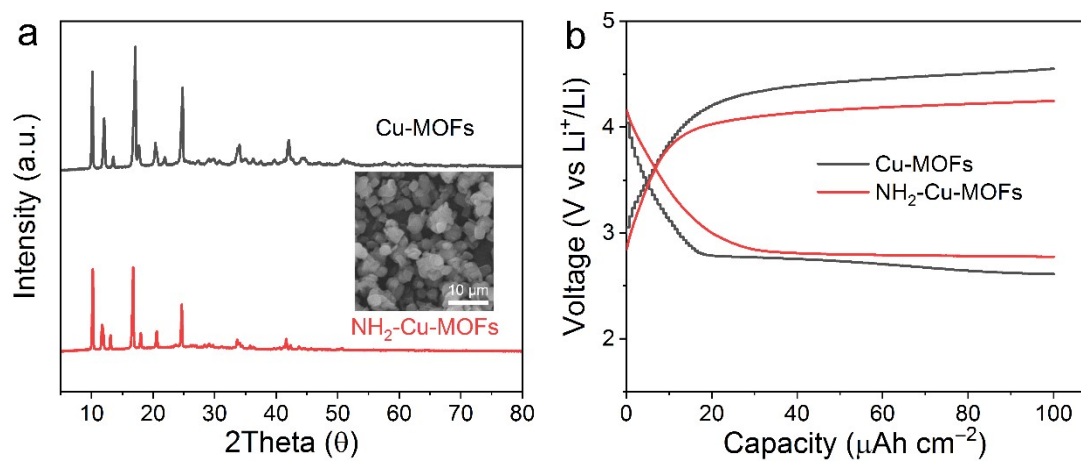

**Figure S15.** (a) XRD pattern of Cu-MOFs and NH<sub>2</sub>-Cu-MOFs. (b) Charge-discharge curves of Cu-MOFs and NH<sub>2</sub>-Cu-MOFs within a limiting capacity of 100 μA h cm<sup>-2</sup> at a current density of 50 μA cm<sup>-2</sup>.



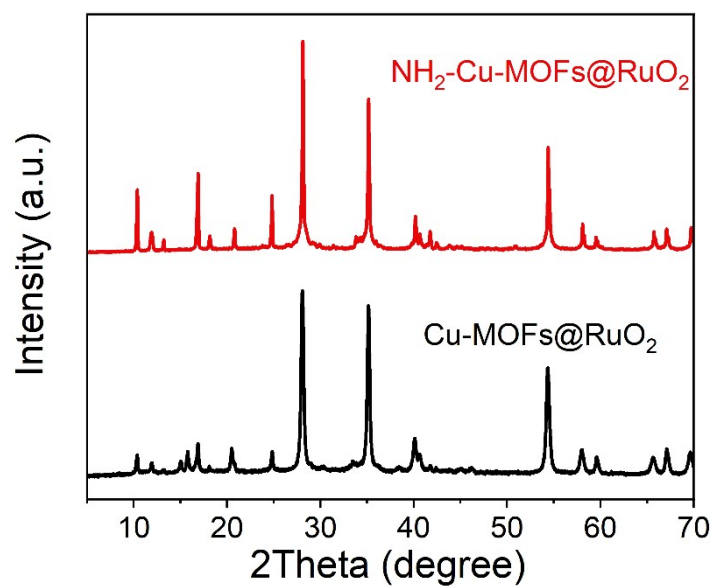

**Figure S16.** Comparison of XRD pattern of  $\text{NH}_2\text{-Cu-MOFs@RuO}_2$  and  $\text{Cu-MOFs@RuO}_2$ .

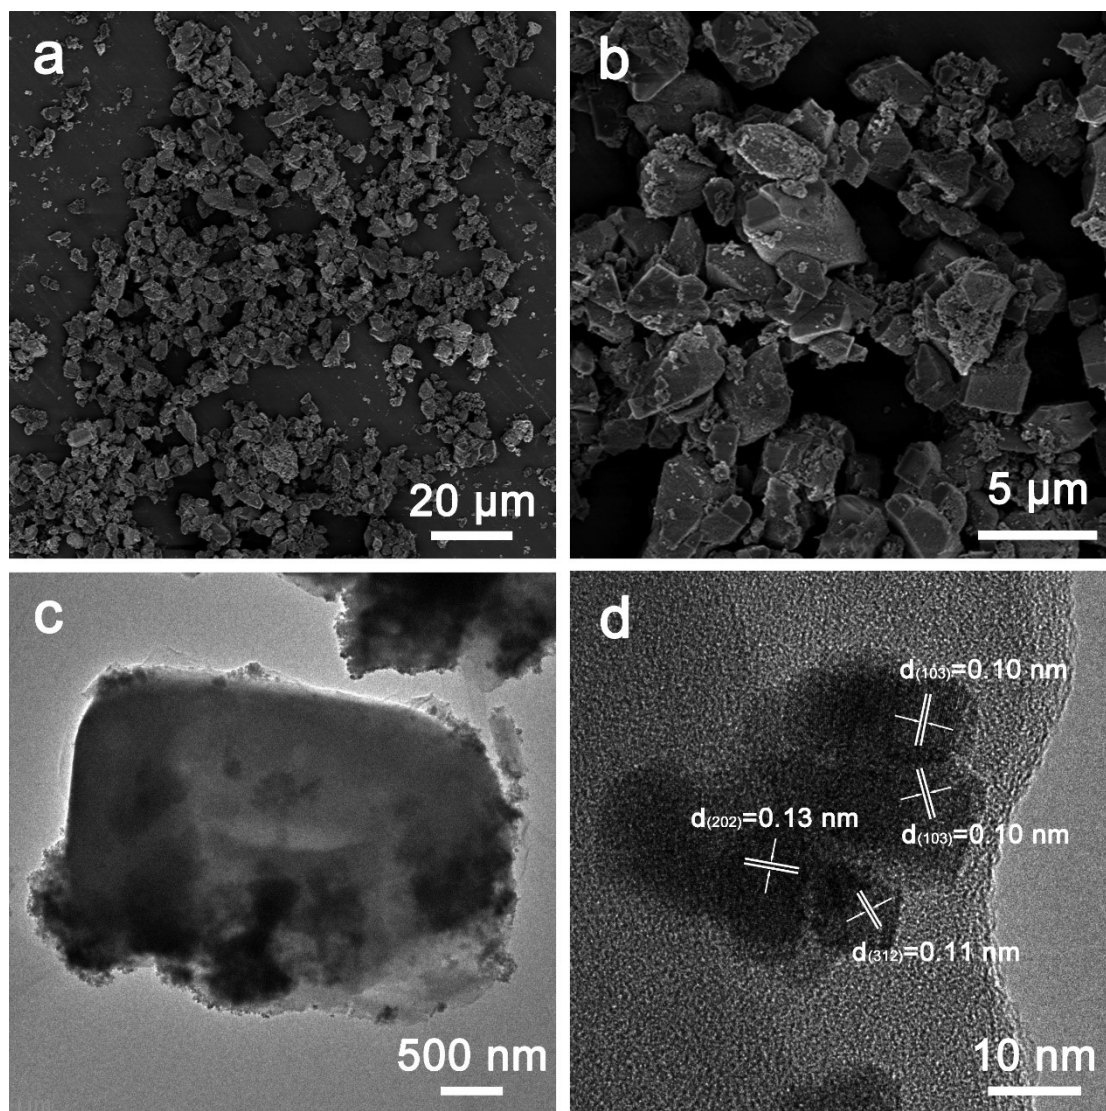

**Figure S17.** (a, b) FESEM images of Cu-MOFs@RuO<sub>2</sub> at different magnifications. (c) TEM and (d) HRTEM images of Cu-MOFs@RuO<sub>2</sub>.

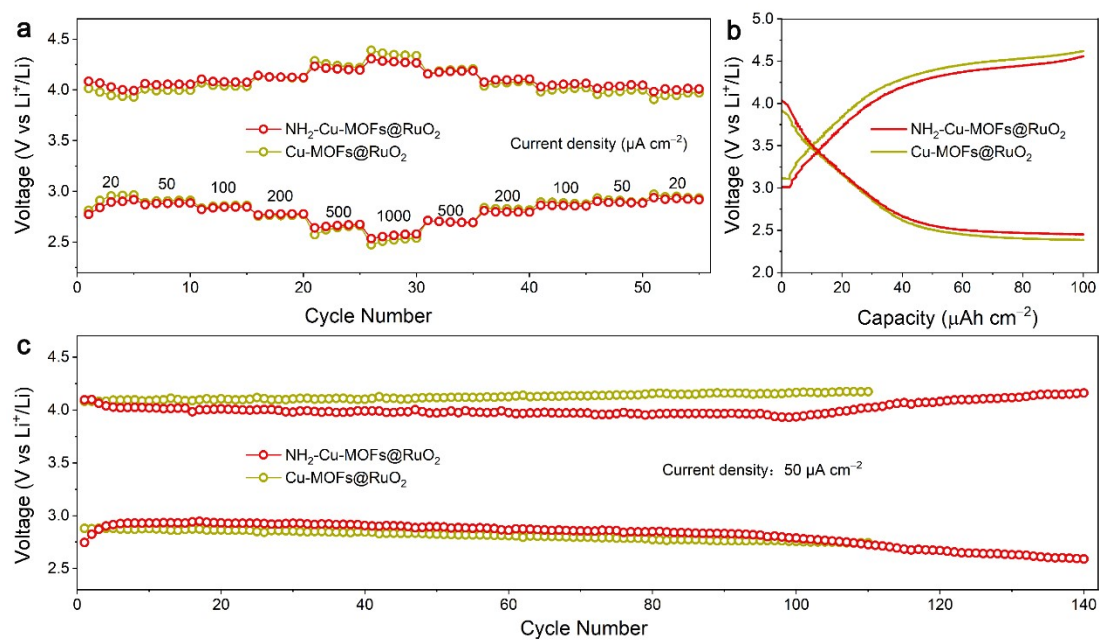

**Figure S18.** The electrochemical performances of Li-CO<sub>2</sub> batteries with NH<sub>2</sub>-Cu-MOFs@RuO<sub>2</sub> and Cu-MOFs@RuO<sub>2</sub> cathodes. (a) Rate performances within a limiting capacity of 100 μA h cm<sup>-2</sup> at various current densities. (b) Charge-discharge curves within a limiting capacity of 100 μA h cm<sup>-2</sup> at a current density of 1000 μA cm<sup>-2</sup>. (c) Cycle performance at a current density of 50 μA cm<sup>-2</sup>.

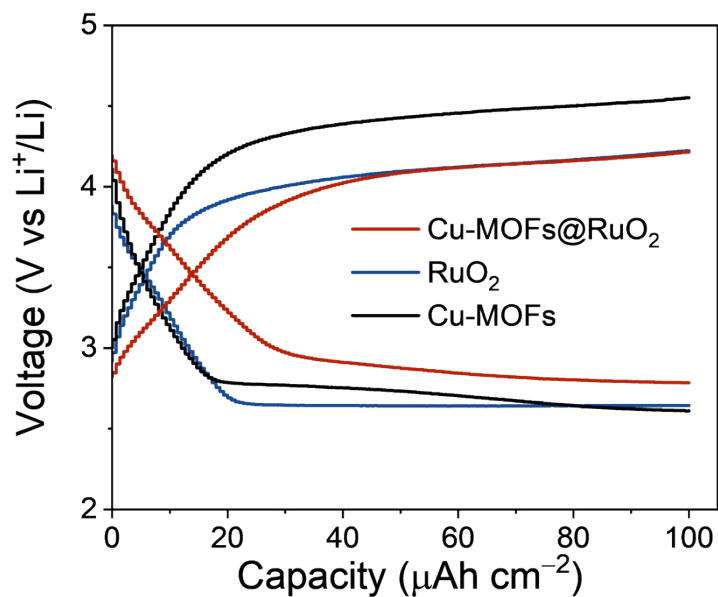

**Figure S19.** Charge-discharge curves of Cu-MOFs@RuO<sub>2</sub>, RuO<sub>2</sub>, and Cu-MOFs within a limiting capacity of 100  $\mu\text{A h cm}^{-2}$  at a current density of 50  $\mu\text{A cm}^{-2}$ .

**Table S1.** The  $R_s$  and  $R_{ct}$  values of NH<sub>2</sub>-Cu-MOFs@RuO<sub>2</sub>, RuO<sub>2</sub>, and Cu-MOFs.

| Sample                                   | $R_s$ ( $\Omega$ ) | $R_{ct}$ ( $\Omega$ ) |
|------------------------------------------|--------------------|-----------------------|
| NH <sub>2</sub> -Cu-MOF@RuO <sub>2</sub> | 34.5               | 70.0                  |
| RuO <sub>2</sub>                         | 36.4               | 107.2                 |
| Cu-MOF                                   | 762.2              | 254.7                 |

**Table S2.** Performance comparison of different Li-CO<sub>2</sub> batteries reported in the literature.

| Cathode catalast                         | Current density<br>(mA g <sup>-1</sup> ) | Cutoff capacity<br>(mAh g <sup>-1</sup> ) | Recyclability<br>(cycles) | References |
|------------------------------------------|------------------------------------------|-------------------------------------------|---------------------------|------------|
| NH <sub>2</sub> -Cu-MOF@RuO <sub>2</sub> | 100                                      | 200                                       | 140                       | This work  |
| RuO <sub>2</sub>                         | 100                                      | 200                                       | 111                       | This work  |
| Cu-MOF                                   | 100                                      | 200                                       | 100                       | This work  |
| CC@Mo <sub>2</sub> C NPs                 | 20                                       | 100                                       | 20                        | Ref. 1     |
| 0.25 M PDS                               | 22                                       | 56                                        | 30                        | Ref. 2     |
| CNT@C <sub>3</sub> N <sub>4</sub>        | 500                                      | 500                                       | 100                       | Ref. 3     |
| MnO@NMCNFs<br>(MOF)                      | 36                                       | 452                                       | 52                        | Ref. 4     |
| Gu-NG                                    | 200                                      | 1000                                      | 50                        | Ref. 5     |
| Ru-Cu-G                                  | 400                                      | 1000                                      | 100                       | Ref. 6     |
| Ru(II) catalyst                          | 300                                      | 1000                                      | 60                        | Ref. 7     |
| Li <sub>2</sub> MnO <sub>3</sub>         | 500                                      | 1000                                      | 30                        | Ref. 8     |
| Mn(HCOO) <sub>2</sub><br>(MOF)           | 200                                      | 1000                                      | 50                        | Ref. 9     |
| Mn <sub>2</sub> (dobdc)<br>(MOF)         | 200                                      | 1000                                      | 50                        | Ref. 10    |
| MnTPzP-Mn<br>(MOF)                       | 200                                      | 1000                                      | 90                        | Ref. 10    |

## Reference

1. J. Zhou, X. Li, C. Yang, Y. Li, K. Guo, J. Cheng, D. Yuan, C. Song, J. Lu and B. Wang, *Adv. Mater.*, 2019, 31, 1804439.
2. R. Pipes, A. Bhargav and A. Manthiram, *Adv. Energy Mater.*, 2019, 9, 1900453.
3. J. Li, K. Zhang, Y. Zhao, C. Wang, L. Wang, L. Wang, M. Liao, L. Ye, Y. Zhang, Y. Gao, B. Wang and H. Peng, *Angew. Chem. Int. Ed.*, 2022, 61, e202114612.
4. S. Li, Y. Liu, X. Gao, J. Wang, J. Zhou, L. Wang and B. Wang, *J. Mater. Chem. A*, 2020, 8, 10354-10362.
5. Z. Zhang, Z. Zhang, P. Liu, Y. Xie, K. Cao and Z. Zhou, *J. Mater. Chem. A*, 2018, 6, 3218-3223.
6. Z. Zhang, C. Yang, S. Wu, A. Wang, L. Zhao, D. Zhai, B. Ren, K. Cao and Z. Zhou, *Adv. Energy Mater.*, 2019, 9, 1802805.
7. Zhang, Z.; Bai, W.-L.; Cai, Z.-P.; Cheng, J.-H.; Kuang, H.-Y.; Dong, B.-X.; Wang, Y.-B.; Wang, K.-X.; Chen, J.-S., Enhanced Electrochemical Performance of Aprotic Li-CO<sub>2</sub> Batteries with a Ruthenium-Complex-Based Mobile Catalyst. *Angew. Chem. Int. Ed.* **2021**, 60 (30), 16404-16408.
8. Z. Zhuo, K. Dai, R. Qiao, R. Wang, J. Wu, Y. Liu, J. Peng, L. Chen, Y.-d. Chuang, F. Pan, Z.-x. Shen, G. Liu, H. Li, T. P. Devereaux and W. Yang, *Joule*, 2021, 5, 975-997.
9. S. Li, Y. Dong, J. Zhou, Y. Liu, J. Wang, X. Gao, Y. Han, P. Qi and B. Wang, *Energy & Environmental Science*, 2018, 11, 1318-1325.
10. L.-Z. Dong, Y. Zhang, Y.-F. Lu, L. Zhang, X. Huang, J.-H. Wang, J. Liu, S.-L. Li and Y.-Q. Lan, *Chem. Commun.*, 2021, **57**, 8937-8940.
